# Supplementary material for: DaLiF: a data lifecycle framework for data-driven governments
Source: Springer Nature journal article supplement (doi:10.1186/s40537-021-00481-3), 2021-06-14
Supplement: MOESM1 [file 19260398]

**Additional File 1 (Addfile1) – Formulated search strings and used these them in digital research libraries search queries**

**Journal - IEEE ( Result : Papers found = 173)**

- (((("Document Title":"data lifecycle" OR "big data lifecycle") OR "Publication Title":"data lifecycle" OR "big data lifecycle") OR "Abstract":"data lifecycle" OR "big data lifecycle") OR "Author Keywords":"data lifecycle" OR "big data lifecycle")
- (((("Document Title":"data lifecycle for government") OR "Publication Title":"data lifecycle for government") OR "Abstract":"data lifecycle for government") OR "Author Keywords":"data lifecycle for government")
- (((("Document Title":"data life cycle" OR "big data life cycle") OR "Publication Title":"data life cycle" OR "big data life cycle") OR "Abstract":"data life cycle" OR "big data life cycle") AND "Abstract":"data life cycle" OR "big data life cycle")
- (((("Document Title":"data ecosystem" OR "big data ecosystem") OR "Publication Title":"data ecosystem" OR "big data ecosystem") OR "Abstract":"data ecosystem" OR "big data ecosystem") OR "Author Keywords":"data ecosystem" OR "big data ecosystem")

**ACM ( Result : Papers found = 127)**

- Title:("data lifecycle" OR "big data lifecycle") OR Abstract:("data lifecycle" OR "big data lifecycle") OR Keyword:("data lifecycle" OR "big data lifecycle") } "filter": { ACM Content: DL, NOT VirtualContent: true }
- { Title:("data lifecycle for data-driven government" OR "big data lifecycle for data-driven government") OR Abstract:("data lifecycle for data-driven government" OR "big data lifecycle for data-driven") OR Keyword:("data lifecycle for data-driven government" OR "big data lifecycle for data-driven government") } filter: { ACM Content: DL, NOT VirtualContent: true }
- { Title:("data life cycle" OR "big data life cycle") OR Abstract:("data life cycle" OR "big data life cycle") OR Keyword:("data life cycle" OR "big data life cycle") } filter: { ACM Content: DL, NOT VirtualContent: true }
- [Publication Title: "data ecosystem"] OR [Publication Title: "big data ecosystem"] OR [Abstract: "data ecosystem"] OR [Abstract: "big data ecosystem"] OR [Keywords: "data ecosystem"] OR [Keywords: "big data ecosystem"]

**Science Direct ( Result: Papers found = 84)**

- Title, abstract, keywords: "data lifecycle for data ecosystem"
- Title, abstract, keywords: "data lifecycle for data-driven government"
- Title, abstract, keywords: "data lifecycle" OR "big data lifecycle"
- Title, abstract, keywords: "data life cycle" OR "big data life cycle"
- "data ecosystem" OR "big data ecosystem"

**Springer (Result: Papers found = 833)**

- "data lifecycle" OR "data life cycle"
- "data ecosystem" OR "Big Data Ecosystem"

**Note:** Here we provided a sample of search strings for the understanding of the readers

<><><><><><><><><>
