# Supplementary material for: DaLiF: a data lifecycle framework for data-driven governments
Source: Springer Nature journal article supplement (doi:10.1186/s40537-021-00481-3), 2021-06-14
Supplement: MOESM3 [file 19260398]

### Existing data lifecycles along with their phases and our proposed data lifecycle (DaLiF)

| Lifecycle                                                           | P1 | P2 | P3 | P4 | P5 | P6 | P7 | P8 | P9 | P10 | P11 | P12 | P13 | P14 |
|---------------------------------------------------------------------|----|----|----|----|----|----|----|----|----|-----|-----|-----|-----|-----|
| Open Government data lifecycle                                      | ×  | ✓  | ✓  | ✓  | ✓  | ✓  | ×  | ✓  | ✓  | ×   | ×   | ×   | ×   | ×   |
| Yuri Demchenko's data lifecycle                                     | ×  | ✓  | ✓  | ✓  | ✓  | ✓  | ×  | ✓  | ✓  | ✓   | ×   | ×   | ✓   | ×   |
| Data lifecycle for multistage privacy protection in IoT environment | ×  | ✓  | ×  | ✓  | ×  | ✓  | ×  | ✓  | ✓  | ×   | ×   | ✓   | ×   | ×   |
| IBM data lifecycle                                                  | ×  | ✓  | ✓  | ✓  | ×  | ✓  | ×  | ✓  | ✓  | ✓   | ×   | ✓   | ✓   | ✓   |
| Information lifecycle                                               | ×  | ✓  | ×  | ×  | ×  | ✓  | ✓  | ✓  | ✓  | ×   | ×   | ✓   | ✓   | ×   |
| IHRB data lifecycle                                                 | ×  | ✓  | ✓  | ✓  | ×  | ✓  | ×  | ×  | ✓  | ×   | ×   | ×   | ×   | ×   |
| Abstract Data Lifecycle Model                                       | ✓  | ✓  | ✓  | ×  | ×  | ✓  | ×  | ✓  | ✓  | ×   | ×   | ×   | ✓   | ✓   |
| COSA-DLC                                                            | ×  | ✓  | ✓  | ✓  | ×  | ✓  | ×  | ✓  | ×  | ×   | ✓   | ✓   | ✓   | ×   |
| Energy big data lifecycle                                           | ×  | ✓  | ✓  | ✓  | ×  | ✓  | ×  | ✓  | ✓  | ×   | ×   | ×   | ✓   | ✓   |
| Data Lifecycle Model for NSF                                        | ×  | ✓  | ✓  | ✓  | ×  | ✓  | ✓  | ✓  | ×  | ×   | ×   | ×   | ✓   | ×   |
| Data lifecycle cycle for smart cities                               | ×  | ✓  | ✓  | ✓  | ×  | ✓  | ×  | ✓  | ✓  | ×   | ✓   | ×   | ×   | ✓   |
| lifecycle for OGD                                                   | ×  | ✓  | ×  | ✓  | ×  | ×  | ×  | ✓  | ✓  | ×   | ✓   | ×   | ×   | ×   |
| Research Data lifecycle                                             | ✓  | ✓  | ✓  | ✓  | ×  | ✓  | ×  | ✓  | ✓  | ×   | ×   | ×   | ×   | ×   |
| Data lifecycle for industry                                         | ×  | ✓  | ×  | ✓  | ×  | ✓  | ×  | ✓  | ✓  | ×   | ×   | ×   | ×   | ×   |
| Lifecycle for big scholarly data                                    | ×  | ✓  | ✓  | ✓  | ✓  | ✓  | ×  | ✓  | ✓  | ×   | ×   | ×   | ×   | ×   |
| Data lifecycle                                                      | ×  | ✓  | ✓  | ✓  | ×  | ✓  | ×  | ✓  | ✓  | ×   | ✓   | ×   | ×   | ✓   |

|                                                           |   |   |   |   |   |   |   |   |   |   |   |   |   |   |
|-----------------------------------------------------------|---|---|---|---|---|---|---|---|---|---|---|---|---|---|
| Lifecycle for big healthcare data                         | × | ✓ | ✓ | ✓ | ✓ | ✓ | × | × | × | × | × | × | × | × |
| Data lifecycle for manufacturing                          | × | ✓ | ✓ | ✓ | ✓ | ✓ | × | ✓ | ✓ | × | × | × | × | × |
| Security data lifecycle                                   | × | ✓ | ✓ | ✓ | ✓ | ✓ | × | × | × | × | × | × | × | × |
| Data lifecycle for cloud computing                        | × | ✓ | ✓ | ✓ | × | ✓ | × | ✓ | ✓ | × | × | × | ✓ | ✓ |
| Lifecycle for big data analytics for psychologists        | ✓ | ✓ | ✓ | ✓ | ✓ | ✓ | × | ✓ | ✓ | × | × | × | ✓ | × |
| Lifecycle for big data value creation                     | × | ✓ | ✓ | ✓ | ✓ | ✓ | × | ✓ | ✓ | × | × | × | × | × |
| Data Lifecycle for industrial and healthcare applications | × | ✓ | ✓ | ✓ | × | ✓ | × | ✓ | ✓ | × | × | × | ✓ | ✓ |
| Lifecycle for CENS Data                                   | × | ✓ | ✓ | ✓ | × | ✓ | × | ✓ | ✓ | × | × | × | × | × |
| Research data lifecycle                                   | ✓ | ✓ | ✓ | ✓ | × | ✓ | ✓ | ✓ | ✓ | × | × | × | ✓ | × |
| Scientific Research data lifecycle                        | ✓ | ✓ | ✓ | ✓ | ✓ | ✓ | ✓ | × | × | × | × | × | ✓ | × |
| Smart data lifecycle                                      | ✓ | ✓ | ✓ | ✓ | ✓ | ✓ | × | × | × | × | ✓ | ✓ | ✓ | ✓ |
| Storage data lifecycle                                    | × | ✓ | ✓ | × | × | ✓ | ✓ | ✓ | ✓ | × | × | × | ✓ | ✓ |
| Data lifecycle for smart healthcare                       | × | ✓ | ✓ | ✓ | × | ✓ | × | ✓ | ✓ | × | × | × | × | × |
| data lifecycle about coal mine industry                   | × | ✓ | ✓ | ✓ | ✓ | ✓ | × | ✓ | ✓ | × | × | ✓ | × | × |
| Data lifecycle for IoTs                                   | × | ✓ | ✓ | ✓ | × | ✓ | ✓ | ✓ | ✓ | × | × | × | × | × |
| Information pyramid of Reynolds and Busby lifecycle       | × | ✓ | ✓ | ✓ | × | × | × | ✓ | × | × | × | × | × | × |
| SCC-data lifecycle                                        | × | ✓ | × | ✓ | × | ✓ | × | ✓ | × | × | ✓ | × | ✓ | × |

|                                                   |   |   |   |   |   |   |   |   |   |   |   |   |   |   |
|---------------------------------------------------|---|---|---|---|---|---|---|---|---|---|---|---|---|---|
| Data lifecycle for IoT                            | ✓ | ✓ | ✓ | ✓ | × | ✓ | ✓ | × | × | × | × | × | ✓ | × |
| Big data (privacy) lifecycle                      | × | ✓ | × | ✓ | × | ✓ | × | × | × | × | × | ✓ | × | × |
| USA (NIST) – [big] data lifecycle model           | × | ✓ | ✓ | ✓ | ✓ | × | ✓ | × | × | × | × | × | × | × |
| Knowledge lifecycle for e-learning                | × | ✓ | × | ✓ | ✓ | × | × | ✓ | ✓ | × | × | × | × | × |
| DataONE lifecycle model                           | ✓ | ✓ | ✓ | ✓ | × | × | × | ✓ | ✓ | × | ✓ | × | × | × |
| lifecycle model for big data management           | × | ✓ | ✓ | ✓ | ✓ | ✓ | × | ✓ | ✓ | × | × | ✓ | ✓ | × |
| Knowledge process-lifecycle                       | × | ✓ | × | × | × | × | ✓ | × | ✓ | × | × | × | × | × |
| Hindawi data lifecycle                            | × | ✓ | ✓ | ✓ | × | ✓ | × | ✓ | ✓ | × | × | × | × | × |
| Data value cycle                                  | × | ✓ | ✓ | ✓ | × | ✓ | × | ✓ | ✓ | × | × | × | ✓ | × |
| Lifecycle in databases                            | × | × | × | × | × | ✓ | × | ✓ | ✓ | × | × | × | ✓ | ✓ |
| DDI Lifecycle                                     | × | ✓ | × | ✓ | × | ✓ | × | ✓ | ✓ | × | × | × | ✓ | × |
| DDC lifecycle                                     | × | ✓ | ✓ | ✓ | × | ✓ | × | ✓ | ✓ | × | ✓ | × | ✓ | × |
| WCM lifecycle                                     | × | ✓ | × | × | × | ✓ | × | ✓ | ✓ | ✓ | × | × | ✓ | × |
| Data Lifecycle for Telco networks data management | × | ✓ | ✓ | ✓ | × | ✓ | × | ✓ | ✓ | × | × | × | ✓ | × |
| USGS lifecycle                                    | ✓ | ✓ | ✓ | ✓ | × | ✓ | × | ✓ | ✓ | × | ✓ | × | ✓ | × |
| Scientific Data Lifecycle Management (SDLM) Model | ✓ | ✓ | ✓ | ✓ | × | ✓ | × | ✓ | ✓ | × | × | × | ✓ | ✓ |
| APDLM                                             | ✓ | ✓ | × | × | × | × | ✓ | ✓ | ✓ | × | × | × | × | ✓ |

|                                                    |   |   |   |   |   |   |   |   |   |   |   |   |   |   |
|----------------------------------------------------|---|---|---|---|---|---|---|---|---|---|---|---|---|---|
| Lifecycle for environmental research data          | × | ✓ | ✓ | × | × | ✓ | ✓ | ✓ | ✓ | × | ✓ | × | ✓ | × |
| Data lifecycle for industry                        | × | ✓ | ✓ | ✓ | ✓ | ✓ | ✓ | ✓ | × | × | × | × | × | × |
| Data lifecycle for cloud computing security        | × | ✓ | × | × | × | ✓ | × | ✓ | ✓ | × | × | × | ✓ | ✓ |
| OGD lifecycle                                      | × | ✓ | ✓ | ✓ | ✓ | ✓ | × | ✓ | ✓ | × | × | × | × | × |
| IoT data lifecycle                                 | × | ✓ | ✓ | ✓ | × | ✓ | ✓ | ✓ | ✓ | × | × | × | ✓ | ✓ |
| Lifecycle for organization's security data         | × | ✓ | ✓ | ✓ | ✓ | ✓ | × | ✓ | × | × | × | × | × | × |
| Big data (privacy) lifecycle                       | × | ✓ | × | ✓ | × | ✓ | × | × | × | × | × | ✓ | × | × |
| lifecycle of cloud data                            | × | ✓ | × | × | × | ✓ | × | ✓ | ✓ | × | × | ✓ | ✓ | ✓ |
| Data Lifecycle Process Model                       | × | ✓ | ✓ | ✓ | × | ✓ | × | × | × | × | ✓ | × | ✓ | × |
| Data lifecycle for cloud automation tools          | × | ✓ | ✓ | ✓ | × | × | × | ✓ | × | × | × | × | × | × |
| UKDA                                               | ✓ | ✓ | ✓ | ✓ | × | ✓ | ✓ | × | ✓ | × | × | × | ✓ | × |
| Data Lifecycle for HPC Scientific data perspective | × | ✓ | ✓ | × | × | ✓ | × | ✓ | ✓ | × | × | × | × | × |
| Lifecycle for social and economic data             | ✓ | ✓ | ✓ | ✓ | × | ✓ | × | ✓ | ✓ | × | ✓ | × | × | × |
| Research big data lifecycle                        | ✓ | ✓ | ✓ | ✓ | ✓ | ✓ | × | ✓ | × | × | × | × | ✓ | × |
| CIGREF data                                        | × | ✓ | ✓ | ✓ | × | × | × | × | × | × | ✓ | × | × | × |
| CMM for SDM                                        | × | ✓ | ✓ | ✓ | × | ✓ | × | ✓ | ✓ | × | × | ✓ | × | × |
| Personal data lifecycle                            | × | ✓ | × | ✓ | × | ✓ | × | × | ✓ | × | × | ✓ | × | × |

|                                        |   |   |   |   |   |   |   |   |   |   |   |   |   |   |
|----------------------------------------|---|---|---|---|---|---|---|---|---|---|---|---|---|---|
| Data lifecycle for Tobacco industry    | × | ✓ | × | × | × | ✓ | × | ✓ | × | × | × | ✓ | × | ✓ |
| Data Lifecycle                         | × | ✓ | × | ✓ | × | × | × | × | × | × | × | ✓ | × | × |
| ANDS verbs [130]                       | × | ✓ | ✓ | × | × | ✓ | ✓ | ✓ | ✓ | × | × | × | ✓ | × |
| Research360 Data Lifecycle             | ✓ | ✓ | × | ✓ | × | × | × | ✓ | ✓ | × | × | × | × | × |
| Web data lifecycle                     | ✓ | ✓ | ✓ | × | × | × | × | ✓ | ✓ | × | × | × | × | × |
| PII lifecycle                          | × | ✓ | ✓ | ✓ | × | ✓ | ✓ | ✓ | ✓ | × | × | × | ✓ | ✓ |
| IRIS Data Lifecycle                    | × | ✓ | ✓ | ✓ | × | ✓ | × | × | × | × | ✓ | ✓ | × | × |
| Data lifecycle for information Science | × | ✓ | × | × | ✓ | ✓ | × | × | × | × | × | × | × | ✓ |
| Data lifecycle for VDS                 | × | ✓ | ✓ | ✓ | × | × | × | ✓ | ✓ | × | × | × | × | ✓ |
| <b>DaLiF</b>                           | ✓ | ✓ | ✓ | ✓ | ✓ | ✓ | ✓ | ✓ | ✓ | ✓ | ✓ | ✓ | ✓ | ✓ |
